# Supplementary material for: Beneficial effects of folic acid on the kidneys and testes of adult albino rats after exposure to methomyl
Source: Royal Society of Chemistry journal article supplement (doi:10.1039/c7tx00309a), 2018-01-01
Supplement: c7tx00309a1.pdf [file c7tx00309a1.pdf]

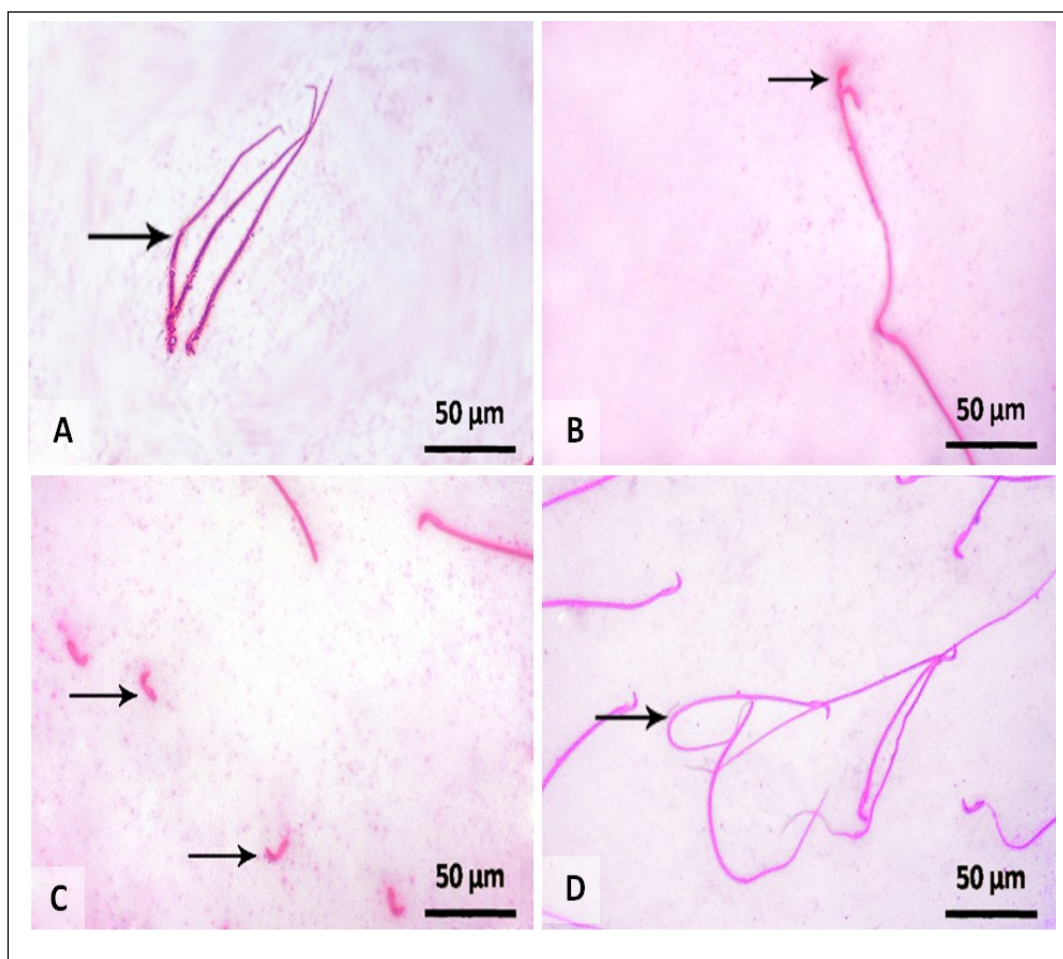

**Supplementary Figure 1.** Photomicrographs of sperms of adult male albino rats. (A) Normal sperm, (B) double headed sperm, (C) multiple detached heads and (D) coiled sperm tail. Nigrosin & Eosin. (Total magnification = x400; Scale bars=50μm.)

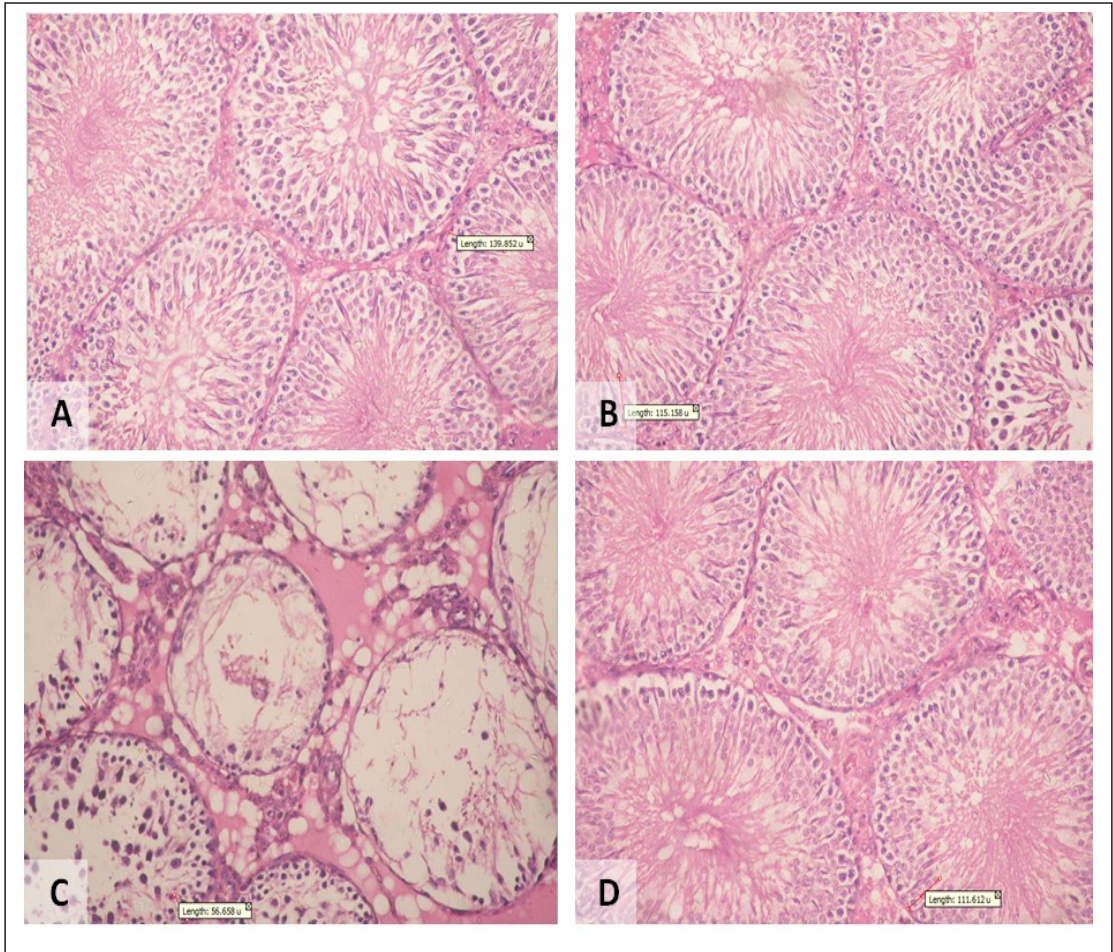

**Supplementary Figure 2.** Print screen of Digimizer to measure the height of germinal epithelium. (A) Control, (B) folic acid, (C) methomyl and (D) methomyl and folic acid treated.
